1 **PrP<sup>Sc</sup>-induced conformational changes and strain-specific structures of PrP<sup>Sc</sup> revealed by**  
2 **Disulfide-crosslink scanning.**

3 Yuzuru Taguchi<sup>1,2\*</sup>, Noriyuki Nishida<sup>2</sup> and Hermann S. Schatzl<sup>1,3\*</sup>

4

5 1 Department of Comparative Biology & Experimental Medicine, Faculty of Veterinary Medicine, University  
6 of Calgary, Calgary, Alberta, Canada.

7 2 Division of Cellular and Molecular Biology, Department of Molecular Microbiology and Immunology,  
8 Nagasaki University Graduate School of Biomedical Sciences, Nagasaki, JAPAN

9 3 Departments of Molecular Biology and of Veterinary Sciences, University of Wyoming, Laramie,  
10 Wyoming, U.S.A.

11

12 Running Head: *Disulfide-crosslinked PrP can be converted by PrP<sup>Sc</sup>*

13

14 \*To whom correspondence should be addressed: Yuzuru Taguchi, ytaguchi@nagasaki-u.ac.jp, or  
15 Hermann M. Schätzl, Dept. of Comparative Biology & Experimental Medicine, University of Calgary, 3280  
16 Hospital Drive NW, Calgary, AB T2N 4Z6, Canada. hschaetz@ucalgary.ca

17

18 Keywords: prion protein; prion conversion; protein cross-linking; protein misfolding; protein structures

19

20

21 **ABSTRACT**

22 There exist many phenotypically-varied prion strains, like viruses, despite the absence of conventional  
23 genetic material which codes the phenotypic information. As prion is composed solely of the pathological  
24 isoform (PrP<sup>Sc</sup>) of prion protein (PrP), the strain-specific traits are hypothesized to be enciphered in the  
25 structural details of PrP<sup>Sc</sup>. Identification of the structures of PrP<sup>Sc</sup> is therefore vital for the understanding of  
26 prion biology, though they remain unidentified due to the incompatibility of PrP<sup>Sc</sup> with conventional  
27 high-resolution structural analyses. Based on our previous hypothesis that the region between the first and  
28 the second  $\alpha$ -helix (H1~H2) and the distal region of the third helix (Ctrm) of the cellular isoform of PrP  
29 (PrP<sup>C</sup>) have important roles for efficient interactions with PrP<sup>Sc</sup>, we created series of mutant PrPs with two  
30 cysteine substitutions (C;C-PrP) which were systematically designed to form an intramolecular disulfide  
31 crosslink between H1~H2 and Ctrm and assessed their conformational changes by prions: Specifically, a  
32 cysteine substitution in H1~H2 from 165 to 169 was combined with cysteine-scanning along Ctrm from 220  
33 to 229. C;C-PrPs with the crosslinks were expressed normally with the similar glycosylation patterns and  
34 subcellular localization as the wild-type PrP albeit with varied expression levels. Interestingly, some of the  
35 C;C-PrPs converted to the protease-resistant isoforms in the N2a cells persistently infected with 22L prion  
36 strain, whereas the same mutants did not convert in the cells infected with another prion strain Fukuoka1,  
37 indicating that local structures of PrP<sup>Sc</sup> in these regions vary among prion strains and contribute to  
38 prion-strain diversity. Moreover, patterns of the crosslinks of the convertible C;C-PrPs implied drastic  
39 changes in positional relations of H1~H2 and Ctrm in the PrP<sup>Sc</sup>-induced conformational changes by 22L  
40 prion. Thus, disulfide-crosslink scanning is a useful approach for investigation of strain-specific structures  
41 of PrP<sup>Sc</sup>, and would be applicable to other types of amyloids as well.

42

43

44 Prions are pathogens composed solely of aberrantly folded isoforms (PrP<sup>Sc</sup>) of cellular prion protein (PrP<sup>C</sup>)  
45 devoid of any nucleotide genome which usually codes pathogenic information. Prions cause fatal  
46 neurodegenerative disorders in various mammalian species, e.g. Creutzfeldt-Jakob disease (CJD) in  
47 humans, scrapie in sheep and goat, chronic wasting disease (CWD) in cervids and bovine spongiform  
48 encephalopathy in cattle [1]. Despite the lack of a nucleotide genome, prions behave like viruses in terms  
49 of *quasi-species* nature, high specificity of host ranges and diversity in clinicopathological features which  
50 are stably inherited over generations [2]. Their pathogenic characteristics are thought to be enciphered in  
51 the structures of PrP<sup>Sc</sup> [3] and high-fidelity representation of the structures on the nascent PrP<sup>Sc</sup> through a  
52 template-guided refolding of PrP<sup>C</sup> by the template PrP<sup>Sc</sup> enables faithful inheritance of the traits.  
53 Elucidation of details of the structures of PrP<sup>Sc</sup> and the refolding process is therefore essential for prion  
54 research, but they have not been unveiled yet because PrP<sup>Sc</sup> is unsuitable for conventional high-resolution  
55 structural analyses. Alternatively, structural models of PrP<sup>Sc</sup> were deduced based on secondary-structural  
56 information of PrP<sup>Sc</sup> obtained with Fourier transform infrared spectroscopy, hydrogen/deuterium exchange  
57 analysis [4][5] or images of electron microscopy on two-dimensional crystals or fibrils of purified PrP<sup>Sc</sup>  
58 [6][7][8]. Structural differences between prion strains were also inferable from varied biochemical  
59 properties of PrP<sup>Sc</sup>, e.g. molecular size of proteinase K (PK)-resistant fragments (PK-res)[9], structural  
60 stabilities in denaturant solutions [10][11] and glycoform ratios [12]. As another approach, Hafner-Bratkovic  
61 et al utilized disulfide crosslinking of recombinant PrPs to identify regions which retain their structures  
62 through the *in vitro* aggregation formation process [13].

63 Unlike PrP<sup>Sc</sup>, high water-solubility and small molecular size of PrP<sup>C</sup> allowed detailed structural  
64 analysis by nuclear magnetic resonance spectroscopy (NMR). The global three-dimensional structures of  
65 PrP<sup>C</sup> are highly conserved among different species with the same secondary-structure components, i.e.  
66 two short beta strands (**Fig. 1A**; B1 and B2) and three alpha helices (H1, H2 and H3) [14][15][16].  
67 Interspecies variation in amino-acid sequences tend to cluster at some spots including the region between  
68 H1 and H2 (H1~H2) or near the C-terminal glycosylphosphatidylinositol (GPI) anchor-attachment site  
69 (Ctrm) [17], which often affect the interspecies transmission of prion [18][19]. For example, an asparagine  
70 at the codon 170 can greatly affect inter-species transmissions of prions; transmission of CWD to  
71 transgenic mice expressing an elk/mouse chimeric PrP with mouse residues only in Ctrm was substantially  
72 inefficient [20]. Moreover, a polymorphism in Ctrm of cervid PrP influences the stability of CWD strains  
73 [21].

74 We previously demonstrated that efficiencies of dominant-negative inhibition by mutant PrPs which  
75 have internal deletions in H1~H2 correlated with the deletion sizes, propounding that H1~H2 might be an  
76 interaction interface for PrP<sup>C</sup>-PrP<sup>Sc</sup> interactions [22]. Besides, positional relations between H1~H2 and  
77 Ctrm seemed important for the deletion mutants to efficiently interact with PrP<sup>Sc</sup>. Inspired by those findings,  
78 we hypothesized that positional relations of H1~H2 and Ctrm are influential on PrP<sup>C</sup>-PrP<sup>Sc</sup> interactions and  
79 the subsequent conversion. To test this hypothesis, we created series of mutant PrPs with two cysteine  
80 (Cys) substitutions (C;C-PrP), one in H1~H2 and the other in Ctrm, which crosslink the two regions by an

81 artificial disulfide bond, and evaluated their effects on the PrP<sup>C</sup>-PrP<sup>Sc</sup> conversion. Those  
82 intramolecularly-crosslinked PrPs were normally expressed on the cell surface and, when expressed in  
83 N2a cells persistently infected with a mouse-adapted scrapie 22L (22L-ScN2a), some of them converted  
84 into PK-res isoforms in a PrP<sup>Sc</sup>-dependent manner. Interestingly, convertibility of the mutants crucially  
85 depended on certain patterns of crosslinks. Furthermore, the convertibility of C;C-PrP seemed to be  
86 strain-dependent, suggesting that this region is responsible for prion-strain diversity. Our unique approach  
87 provides novel insights into the structural requirements for PrP<sup>C</sup>-PrP<sup>Sc</sup> conversion.

88

## 89 **EXPERIMENTAL PROCEDURES**

90 *Reagents and antibodies*—All media and buffers for cell culture and Lipofectamine LTX Plus were from  
91 Life Technology Corporation (Carlsbad, CA, USA). Plasmid purification kit, DNA gel extraction kit,  
92 Site-directed mutagenesis kit, detergents [including Triton X-100 (TX100), deoxycholic acid (DOC), Triton  
93 X-114 (TX114), Tween 20 and sodium dodecyl sulfate (SDS)], proteinase K (PK), anti-PrP monoclonal  
94 antibodies (mAb) 4H11 and 3F4 (recognizing residues 108–111 of human PrP), and all secondary  
95 antibodies were as previously reported [22]. Iodoacetamide (IAA), dithiothreitol (DTT), Glu-C  
96 endopeptidase (V8 protease), and anti-FLAG polyclonal antibody were purchased from Sigma-Aldrich Co.,  
97 LLC (St. Louis, MO, USA).

98 *Site-directed mutagenesis*—All primers for site-directed mutagenesis were ordered from Integrated  
99 DNA Technologies, Inc. (Coralville, IA, USA) and are listed in **Table S1**. Mutations were made with  
100 QuickChange Site-Directed Mutagenesis Kit (Agilent Technologies, Inc., Santa Clara, CA, USA) according  
101 to the manufacturer's instruction. Sequences of mutant PrPs were determined by Eton Bioscience, Inc.  
102 (San Diego, CA, USA).

103 *Cell culture, transient transfection and analysis of PK-resistant fragments* – Transient transfection of  
104 mouse neuroblastoma cell lines with or without persistent scrapie infection (22L-ScN2a or N2a,  
105 respectively), and procedures for preparation of samples of transfected N2a or 22L-ScN2a cells were as  
106 previously described [22], except for some modifications. Briefly, cells on 24-well plates were transfected  
107 with 0.3 µg/well of each plasmid with Lipofectamine LTX Plus (Life Technologies) for evaluation of  
108 expression or PK-res levels of mutant PrPs. For evaluation of dominant-negative inhibition, 0.2 µg each of  
109 (3F4)MoPrP and mutant PrP were co-transfected. The Fukuoka1- and RML-infected N2a58 cells were  
110 also previously described [23][24].

111 *SDS-polyacrylamide gel electrophoresis (SDS-PAGE) and immunoblotting*—The protocol for  
112 SDS-PAGE, development of blots, methods of densitometry and quantification have been described  
113 previously [22].

114 *Digestion with V8 protease*—N2a cells, ~60 % confluent on 6-well culture plates, were transiently  
115 transfected with 1.0 µg/well of plasmid coding the mutant PrP with Lipofectamine LTX. Next day, the  
116 medium was replaced with fresh medium and cells were cultured further at 37°C in a CO<sub>2</sub> incubator. 48  
117 hours after transfection, cells were rinsed once with phosphate-buffered saline (PBS) and then 1 ml/well of

118 1.5 mM IAA in PBS was overlaid and incubated for 10 minutes at 4°C. After removal of IAA, cells were  
119 rinsed once with PBS without calcium and magnesium (Ca/Mg) and incubated in 700 µl/well of 3mM EDTA  
120 in PBS without Ca/Mg at 4°C for 5 minutes. Then, the cells were mechanically detached by pipetting and  
121 collected in a tube. The cell suspension was centrifuged at 1,000 x g at 4°C for 5 minutes and the  
122 supernatant was discarded. 400 µl of phosphate-buffered 2% Triton X-114 (TX114) lysis buffer was added,  
123 cells were resuspended by vortexing for ~10 seconds, and incubated on ice for 30 minutes, with a few  
124 seconds of vortexing from time to time. The lysate was then centrifuged at 16,100 x g at 4°C for 1 minute  
125 and the supernatant transferred to a screw-cap tube as TX114 lysate. PrP was concentrated by TX114  
126 extraction and methanol/chloroform precipitation as previously described [22]. The pelleted proteins after  
127 methanol/chloroform precipitation were dissolved in 0.5% SDS in 50 mM sodium bicarbonate on a shaking  
128 incubator (Thermomixer; Eppendorf AG, Germany), at 95°C for 10 minutes with shaking at 1,400 rpm.  
129 After the pellet was completely dissolved, the solution was diluted with a 4-fold volume of 200 mM sodium  
130 bicarbonate to dilute SDS concentration, so that V8-protease efficiently digests PrP. After addition of 2 µl  
131 of V8 protease (2.5 U/µl), the solution was incubated at 37°C for 1 hour. Finally, 1/4-volume of 5 x sample  
132 buffer with or without DTT was added and boiled. For re-probing of the PVDF membrane, the membrane  
133 was incubated in 100 % methanol for 20 minutes, washed in TBST and incubated with another primary  
134 antibody in 5% milk in TBST.

135 *Immunofluorescence analysis* – The procedures for transient transfection of cells, fixation,  
136 permeabilization, and immunolabeling were as reported previously [22], except that samples were  
137 analyzed on an epifluorescence microscope, Olympus IX51, with objective lens Olympus LUCPlanFL N 40  
138 x (0.60), and images were acquired with software Olympus DP2-BSW.

139

## 140 RESULTS

141 *Design of C;C-PrP series* – In order to assess the significance of the intramolecular interactions  
142 between H1~H2 and Ctrm on PrP<sup>C</sup>-PrP<sup>Sc</sup> interactions and the subsequent conversion, we created series  
143 of mutant PrPs which have two Cys substitutions, one in H1~H2 and the other in Ctrm so that the two  
144 regions are cross-linked by an artificial disulfide bond (**Fig. 1A**), and tested their conversion to PK-res  
145 forms. For the Cys substitution in H1~H2, we selected Val165 and Asp166 (residues were numbered  
146 according to mouse numbering unless otherwise noted), because they are close enough to Ctrm to form a  
147 stable disulfide crosslink in a native PrP<sup>C</sup> conformation (PDB ID: 2L39) [14]. Since the global conformation  
148 of a mutant human PrP with an extra disulfide bond between residues 166 and 221 (in human numbering;  
149 they are equivalent to 165 and 220 of mouse PrP, respectively) was indeed similar to that of wild-type  
150 human PrP [25][26], we expected that the same holds for mouse PrP. The second Cys substitution  
151 scanned Ctrm from the residue 220 to 229. C;C-PrP constructs are named after the positions of Cys but  
152 only the last-digit numbers were used for simplicity, e.g. a mutant with Cys at 165 and 229 is named as  
153 “5C;9C”. Since a 3F4 epitope-tagged mouse PrP [(3F4)MoPrP] was used as the template for site-directed  
154 mutagenesis, every mutant PrP carries a 3F4 epitope tag.

155 *Expression levels, glycosylation and subcellular localization of C;C-PrP series* - We transfected N2a  
156 mouse neuroblastoma cells with the plasmids coding 165C;C- and 166C;C-series (**Fig. 1A**) to examine  
157 expression levels and glycosylation status of the mutant PrPs. Banding patterns of all mutants were similar  
158 to that of (3F4)MoPrP (**Fig. 1B**), typical of PrP<sup>C</sup> with complex-type N-linked glycans and GPI anchor, and  
159 lacked the dimeric forms (**Fig. 1B**, square bracket). Their expression levels were varied (**Fig. 1B**, graphs).  
160 A C;C-PrP which has Cys residues equivalent to those of the aforementioned human PrP mutant [25],  
161 namely 5C;0C, showed the highest expression level comparable to (3F4) (**Fig. 1B**, lane 2) presumably  
162 because its intramolecular disulfide crosslink between the substituted Cys did not interfere with the native  
163 PrP<sup>C</sup> conformation as discussed later. All the 166C;C-series mutants showed similar banding patterns as  
164 165C;C-series without discernible dimeric forms (**Fig. 1C**, square bracket). 6C;1C and 6C;4C showed  
165 highest expression levels among 166C;C-series (**Fig. 1C**, lanes 3 and 6). “Intramolecular” disulfide  
166 crosslink of C;C-PrPs is implied by the absence of discernible dimeric forms; unlike C;C-PrPs, all the  
167 mutant PrPs with a single Cys substitution formed substantial levels of dimeric forms which are  
168 presumably crosslinked by an ‘intermolecular’ disulfide bond and disappear upon dithiothreitol (DTT)  
169 treatment [**Fig. 1D**, DTT(-) vs (+)].

170 To rule out the possibility that the Cys residues at 178 and 213 which contribute to the native disulfide  
171 bond might be shuffled to couple with the substituted Cys, we replaced either Cys at 178 or 213 with  
172 alanine so that the native disulfide bond is broken and instead coupled with 166C (6C;C178A and  
173 6C;C213A) (**Fig. 1E**, schematic). The banding patterns of those mutants were very different from that of  
174 wild-type PrP, reminiscent of PrP with high-mannose-type N-linked glycans [27] (**Fig. 1E**, right panel). The  
175 absence of those features supported that C;C-PrPs form an intramolecular disulfide crosslink between the  
176 substituted Cys without affecting the native disulfide and undergo normal folding and processing in ER and  
177 trans-Golgi network. In accordance with the view, immunofluorescence analysis demonstrated that  
178 C;C-PrPs were distributed on the cell surface (**Fig. 2**, non-permeabilized) and in the perinuclear region as  
179 clusters (**Fig. 2**, permeabilized) like wild-type PrP, corroborating normal intracellular trafficking and  
180 subcellular localization of C;C-PrPs.

181 *Evidence for intramolecular disulfide crosslink formation* – To demonstrate intramolecular disulfide  
182 crosslink formation by the substituted Cys, we introduced a FLAG-tag to C;C-PrPs (**Fig. 3A**) and analyzed  
183 the fragment patterns of V8 protease-digested products. A crosslink between H1~H2 and Ctrm  
184 theoretically produces extra bands on immunoblots by bonding fragments (**Fig. 3A**). Indeed, V8-digested  
185 FLAG-tagged (3F4)MoPrP, 166C, 6C;3C and 6C;9C (**Fig. 3B**) showed distinct banding patterns along with  
186 findings suggestive of intramolecular disulfide crosslink: First, full-length 6C;3C-FLAG and 6C;9C-FLAG  
187 remained after the digestion (**Fig. 3B**, compare lanes 7 and 8, arrowhead), whereas full-length  
188 (3F4)Mo-FLAG and 166C-FLAG PrP were completely digested (**Fig. 3B**, compare lanes 5 and 6,  
189 arrowhead). Relative protease resistance of C;C-PrPs was also implied by smaller amounts of fragments  
190 produced by endogenous proteolysis (**Fig. 3B**, lanes 3 and 4, square bracket). These are attributable to  
191 steric effects caused by the crosslink of H1~H2 and Ctrm concealing protease-vulnerable regions. Second,

192 the greatly improved immunoreactivity of the smallest fragments of 6C;3C-FLAG and 6C;9C-FLAG by DTT  
193 treatments (**Fig. 3B**, lanes 7 vs. 11 or 8 vs. 12) also indicates the steric effects hiding the epitope and its  
194 re-exposure by DTT which breaks apart the crosslinked fragments. Third, the intermediate size fragments  
195 of V8-digested 6C;3C-FLAG and 6C;9C-FLAG (**Fig. 3B**, arrowhead and square bracket, respectively)  
196 which disappeared by DTT (**Fig. 3B**, lanes 7 and 8, curled bracket) would apparently represent the  
197 predicted “extra fragments” (**Fig. 3B**, lanes 5 and 6, square bracket). Taken together, these findings  
198 strongly support the intramolecular crosslink formation between the Cys residues.

199 *Conversion of C;C-PrPs into PK-res isoforms by bona fide PrP<sup>Sc</sup>* – Next, we assessed conversion  
200 efficiencies of 165C;C- and 166C;C-series mutants by expressing them in 22L-ScN2a and evaluating their  
201 PK-res. Among 165C;C-series, only 5C;8C and 5C;9C showed PK-res (**Fig. 4A**), while 166C;C-series  
202 exhibited gradually increasing levels of PK-res from 6C;5C to 6C;9C (**Fig. 4B**). Just as PrP<sup>C</sup> isoforms,  
203 PK-res of C;C-PrPs lacked dimeric forms (**Fig. 4C**, Double-Cys), whereas every single-Cys PrPs tested  
204 showed intense dimeric bands (224-229C; **Fig. 4C**, Single-Cys) which disappeared with DTT (**Fig. 4D**).  
205 These data support the view that the PK-res of C;C-PrPs were not derived from PrP<sup>C</sup> isoform with free Cys  
206 residues, i.e. without crosslink, but from those with the intramolecular disulfide crosslink. The absence of  
207 PK-res in non-infected N2a cells demonstrated that the conversion of 6C;9C into PK-res isoform was  
208 PrP<sup>Sc</sup>-dependent (**Fig. 4E**, lane 5). We thought that the non-convertible C;C-PrPs, e.g. those from 6C;0C  
209 to 6C;4C, cannot convert because of their unsuitable positioning of H1-H2 for efficient refolding as  
210 discussed later, but there also was a possibility that they just cannot encounter PrP<sup>Sc</sup> template in the cells.  
211 We tested the possibility by assessing their dominant negative inhibition efficiencies, as previously  
212 described [22]. Since 6C;0C to 6C;4C would not show discernible PK-res, the constructs could be used  
213 without any modification. Not unexpected, 6C;0C to 6C;5C exhibited very efficient dominant-negative  
214 inhibition on the co-expressed convertible (3F4)MoPrP (**Fig. 4F**, lanes 2-7), confirming that these  
215 C;C-PrPs do interact with template PrP<sup>Sc</sup> but cannot convert into PK-res isoforms.

216 *The disulfide crosslink can suppress influences of Q218K substitution on PrP<sup>Sc</sup> conversion* – Lysine at  
217 the codon 219 (in human numbering; K219) is a polymorphism of human PrP well-known for protective  
218 effects against sporadic CJD [28], and the equivalent substitution in mouse PrP (Q218K) is also protective  
219 against mouse-adapted scrapie [29]. These effects were explained by the inability of K219 PrP to convert  
220 into PrP<sup>Sc</sup> and its dominant-negative inhibition on the coexisting wild-type PrP [30]. As the effects of K219  
221 was attributed to alteration in structures of the B2-H2 loop [31][32], we tested whether a mutant PrP  
222 combining 6C;9C and Q218K (218K/6C;9C) can convert to PK-res on 22L-ScN2a cells. Interestingly,  
223 218K/6C;9C showed similar PK-res levels as 6C;9C (**Fig. 4G**, lanes 3 vs. 4), whereas Q218K PrP showed  
224 much lower levels compared to wild-type PrP (**Fig. 4G**, lanes 1 vs. 2). This suggested that the artificial  
225 disulfide crosslink of 6C;9C can suppress the effects of Q218K.

226 *Prediction of the existence of another C;C-PrP that can convert* – The dependence of PK-res  
227 conversion of C;C-PrPs on *bona fide* PrP<sup>Sc</sup> indicated that they are results of refolding reaction induced by  
228 PrP<sup>Sc</sup>. Tolerance of PK-res conversion reaction to specific disulfide crosslinks, namely those of 6C;5C to

229 6C;9C, 5C;8C and 5C;9C, seemed to be reasonably explained with a model where H1~H2 undergoes a  
230 positional change towards Ctrm during refolding into PK-res (**Fig. 5A**): i.e. a disulfide crosslink between  
231 Cys at position 165 or 166 and Cys229 does not interfere with the refolding process (**Fig. 5B**). The model  
232 predicted the existence of another disulfide crosslink which would not interfere with the refolding reaction,  
233 bonding a more distal H1~H2 residue and a more proximal Ctrm residue (**Fig. 5C vs. 5D**). To test this  
234 hypothesis, we created 168C;C-PrPs (**Fig. 6A**) and assessed their conversion efficiencies in 22L-ScN2a.  
235 Expression levels of 168C;C PrPs in N2a cells were similar to that of 165C;C- and 166C;C-series mutants  
236 (**Fig. 6B**): 8C;1C showed expression comparable to (3F4)MoPrP, and 8C;4C and 8C;5C showed  
237 moderately high expression. In 22L-ScN2a cells, only 8C;4C and 8C;5C converted into PK-res forms at  
238 detectable levels (**Fig. 6C**) in a PrP<sup>Sc</sup>-dependent manner (**Fig. 6D**). Although we also combined 167C or  
239 169C with Cys-scanning in Ctrm from 224 to 229 and 221 to 226, respectively, there were no discernible  
240 levels of PK-res.

241 *Strain dependence of PK-res conversion of 8C;5C* – We previously hypothesized that a PrP molecule  
242 has multiple PrP<sup>C</sup>-PrP<sup>Sc</sup> interfaces including H1~H2, and the usage of the interfaces are varied among  
243 different prion strains [33]. To test the hypothesis, we expressed 8C;5C on Fukuoka1- or RML-infected  
244 N2a58 cells and compared its conversion to PK-res. Surprisingly, PK-res of 8C;5C was seen only in  
245 RML-infected cells, whereas completely absent in Fukuoka1-infected cells (**Fig. 6E**).

246

## 247 DISCUSSION

248 In this study, we have demonstrated that positional relations of H1~H2 and Ctrm are influential on  
249 PrP<sup>C</sup>-PrP<sup>Sc</sup> interactions and the subsequent conversion by exploiting new investigation tools, i.e. the series  
250 of systematically-designed mutant PrPs with an artificial disulfide crosslink between H1~H2 and Ctrm.  
251 Analysis of expression levels and conversion efficiencies of C;C-PrPs in 22L-ScN2a revealed possibility of  
252 positional changes of H1~H2 in the PrP<sup>Sc</sup>-guided refolding into PK-res. Besides, the positional change  
253 might be a strain-specific event, suggesting that these regions greatly contribute to the prion strain  
254 diversity. Following are the detailed discussions on the present findings:

255 *Expression levels of PrP<sup>C</sup> isoforms of C;C-PrPs reflect their conformations* – First, a variation in  
256 expression levels among C;C-PrPs, with some comparable to (3F4)MoPrP and others much less, is worthy  
257 to note. What could the variation represent? As mentioned above, a disulfide cross-link of human PrP  
258 between the residues 166 and 221 or 225 (human numbering) maintains or even stabilizes the global  
259 structure of PrP<sup>C</sup> in the native conformation [25][26]. Likewise, the corresponding residues of mouse PrP<sup>C</sup>,  
260 residues 165 and 220, are close enough to form a stable disulfide bond [c.f. PDB ID: 2L39 [14]] and the  
261 disulfide crosslink of 5C;0C would not interfere with the native PrP<sup>C</sup> conformation. This conformation  
262 possibly underlies the high expression levels of 5C;0C, because the native conformation would be  
263 thermodynamically stable with least molecular-surface hydrophobic patches which are targeted by ER or  
264 post-ER quality control systems, hence least elimination by those systems. To the contrary, the  
265 low-expression C;C-PrPs might have aberrant conformation and be actively eliminated by the quality



266 control systems. Although the replaced residues of low-expression C;C-PrPs tend to be located too far  
267 apart to form a disulfide crosslink, possibly structural fluctuations of H1~H2 and Ctrm allow them to  
268 crosslink and fixate PrP<sup>C</sup> of C;C-PrP at an aberrant conformation.

269 *Implications about regional structures of PK-res* – 165C;C-, 166C;C- and 168C;C-series showed  
270 respective unique patterns of distribution of convertible mutants. This demonstrated that positions of the  
271 disulfide crosslinks between H1~H2 and Ctrm are critical determinants of convertibility rather than  
272 positions of Cys itself. Since a disulfide crosslink between two regions fixates the relative positioning and  
273 local structures of the regions [34], successful introduction of artificial disulfide crosslinks to a protein  
274 without affecting the global conformation is highly informative about the regional structures of the protein.  
275 The approach was adopted in the investigation of regional structures of PrP<sup>C</sup> and PrP fibrils, as well  
276 [13][25][26]. The convertible C;C-PrPs are also highly informative about the regional structures of PrP<sup>Sc</sup> or  
277 PK-resistant intermediate, because positional relations of their H1~H2 and Ctrm are compatible with the  
278 refolding process and would not be required to greatly change for the conversion. Moreover, the  
279 discrepancy between the most-highly-expressed and the most-efficiently-converted in each series (e.g.  
280 8C;1C vs 8C;5C) is also intriguing. As discussed above, high expression levels of C;C-PrPs imply that their  
281 conformations are similar to the native PrP<sup>C</sup> conformation; in other words, the positional relations of  
282 H1~H2 and Ctrm of those mutants are suitable for the native PrP<sup>C</sup> conformation. As the convertible  
283 C;C-PrPs obviously have crosslinks suitable for the conversion process, the discrepancy between the  
284 highly-expressed and the efficiently-converted is consistent with the view that a substantial positional  
285 changes of H1~H2 toward Ctrm, from the PrP<sup>C</sup>-isoform position to the PrP<sup>Sc</sup>-isoform position, occurs in the  
286 conversion reaction in 22L-ScN2a (**Fig 6D**).

287 Among the convertible C;C-PrP constructs, 8C;4C and 8C;5C are particularly interesting. Kurt and  
288 colleagues reported that replacement of tyrosine at the residue 168 with aromatic residues does not affect  
289 the conversion of the mutant PrPs in *in vitro* conversion [35]. Mutant PrPs with Y168F- or  
290 Y224F-substitution also normally converts on RML-infected N2a cells [36]. Possibly aromatic-aromatic  
291 interactions between Y168 and Y224 or Y225 contribute to the conversion of wild-type PrP by bonding  
292 H1~H2 onto Ctrm. The strain dependence of PK-res conversion of 8C;5C was the most important finding  
293 in this study, because it demonstrated strain-dependent significance of H1~H2-Ctrm interactions for  
294 PK-res formation, which strongly supports our hypothesis that the strain diversity of PrP<sup>Sc</sup> stems from  
295 varied usage of the interfaces among strains [33]. Fukuoka1 and RML PrP<sup>Sc</sup> could have distinct structures  
296 in those regions. Our finding is also consistent with the strain-specific resistance of mice expressing PrP  
297 with N170S [37] regarding the strain-dependent significance of regional structures in H1~H2. Besides,  
298 differences in the regional structures around Ctrm of PrP<sup>Sc</sup> between ME7, 22L, and RML are implied by  
299 their distinct immunoreactivity [38]. The position-change model exemplifies a specific regional structure  
300 which could reasonably explain those discoveries.

301 The distribution of the convertible C;C-PrPs were also informative about the local structure of H1~H2  
302 in PrP<sup>Sc</sup>. As reported by Hennetin et al. [39], in the loop region of parallel  $\beta$ -sheet structures, i.e. " $\beta$

303 -arches”, side chains of two successive residues often point outward of the arch, while the other regions of  
304 the  $\beta$ -arch have inward- and outward-facing residues alternately. Along with the proline at the residue 164,  
305 the existence of convertible mutants both in 165C;C- and 166C;C-series suggests that the residues 165  
306 and 166 correspond to the residues at the loop region of a  $\beta$ -arch in PrP<sup>Sc</sup>, because their side chains need  
307 to point outward to form a disulfide bond with the counterpart in Ctrm. The lack of discernible PK-res in  
308 167C;C- and 169C;C-series would be also consistent with the presence of a  $\beta$ -arch in the region.

309 Important things to be clarified through further investigation on conversion of C;C-PrPs include  
310 whether the convertible mutants can convert independently of co-existing wild-type PrP and whether they  
311 also inherit infectivity. If they can mediate infectivity and develop unique clinicopathological pictures, the  
312 C;C-PrPs might provide an insight into structure-phenotype relations of PrP<sup>Sc</sup>, because the local structures  
313 of H1~H2 and Ctrm are partially predictable. In this regard, transgenic mice expressing C;C-PrPs would be  
314 even more informative.

315 *Effects of Q218K on the conversion efficiency of 6C;9C* – K219 polymorphism of human PrP is  
316 protective against sporadic CJD but the exact underlying mechanism is yet to be identified. The partial  
317 suppression of the effects of Q218K by the disulfide crosslink of 6C;9C implied the involvement of  
318 positional relations of H1~H2 and Ctrm. To note, although K219 of human PrP slows or modifies  
319 pathologies of sporadic CJD [28][29][31][40], new-variant CJD might not be affected or even precipitated  
320 [41][42]. This is consistent with our view that the significance of the positional relation of those regions is  
321 strain-dependent.

322 *Mechanism of diglycoform predominance of PrP<sup>Sc</sup>* – Diglycoform predominance of PrP<sup>Sc</sup> is  
323 characteristic of new-variant CJD and some familial CJD [12]. It also occurs in experimental transmission  
324 to elk or bank vole [20][43]. The diglycoform predominance of PK-res of C;C-PrPs in 22L-ScN2a imply that  
325 the positional relation between H1~H2 and Ctrm of the nascent PrP<sup>Sc</sup> is one determinant of the glycoform  
326 ratio. One possible mechanism is that the crosslink between H1~H2 and Ctrm is advantageous for  
327 conversion of the diglycoform C;C-PrP. As the diglycoform of PrP<sup>C</sup> isoform is much more abundant than  
328 the other glycoforms, theoretically even a small improvement in conversion efficiency of the diglycoform  
329 can change the glycoform ratio.

330 In conclusion, thus disulfide-crosslink scanning are unique and promising investigation tools which  
331 help locate positions of  $\beta$ -arches and identify their local structures. Whether  $\beta$ -solenoid or in-register  
332 parallel  $\beta$ -sheet amyloid, properties of prions can depend on those factors as long as they consist of  
333  $\beta$ -strands and turns/loops[44]. Therefore, C;C-PrPs can greatly contribute to the elucidation of mysteries  
334 about prion. The intramolecular crosslink approach can be also applicable to other types of amyloids than  
335 PrP<sup>Sc</sup> in theory and advance more general amyloid researches.

336

337 **REFERENCES**

- 338 1. Prusiner SB. Prions. *Proc Natl Acad Sci U S A*. 1998;95: 13363–13383.
- 339 2. Collinge J, Clarke AR. A general model of prion strains and their pathogenicity. *Science*. 2007;318:  
340 930–936. doi:10.1126/science.1138718
- 341 3. Telling GC, Parchi P, DeArmond SJ, Cortelli P, Montagna P, Gabizon R, et al. Evidence for the  
342 conformation of the pathologic isoform of the prion protein enciphering and propagating prion  
343 diversity. *Science*. 1996;274: 2079–82.
- 344 4. Baron GS, Hughson AG, Raymond GJ, Danielle KO, Barton KA, Raymond LD, et al. Effect of  
345 Glycans and the Glycophosphatidylinositol Anchor Improved Purifications and Infrared Spectra.  
346 *Biochem* 2011,. 2011;50: 4479–4490.
- 347 5. Smirnovas V, Baron GS, Offerdahl DK, Raymond GJ, Caughey B, Surewicz WK. Structural  
348 organization of brain-derived mammalian prions examined by hydrogen-deuterium exchange. *Nat*  
349 *Struct Mol Biol*. Nature Publishing Group; 2011;18: 504–6. doi:10.1038/nsmb.2035
- 350 6. Wille H, Michelitsch MD, Guenebaut V, Supattapone S, Serban A, Cohen FE, et al. Structural  
351 studies of the scrapie prion protein by electron crystallography. *Proc Natl Acad Sci U S A*. 2002;99:  
352 3563–3568.
- 353 7. DeMarco ML, Silveira J, Caughey B, Daggett V. Structural properties of prion protein protofibrils  
354 and fibrils: an experimental assessment of atomic models. *Biochemistry*. 2006;45: 15573–82.  
355 doi:10.1021/bi0612723
- 356 8. Groveman BR, Dolan M a, Taubner LM, Kraus A, Wickner RB, Caughey B. Parallel in-register  
357 intermolecular  $\beta$ -sheet architectures for prion-seeded prion protein (PrP) amyloids. *J Biol Chem*.  
358 2014;289: 24129–42. doi:10.1074/jbc.M114.578344
- 359 9. Saverioni D, Notari S, Capellari S, Poggiolini I, Giese A, Kretschmar HA, et al. Analyses of  
360 protease resistance and aggregation state of abnormal prion protein across the spectrum of human  
361 prions. *J Biol Chem*. 2013;288: 27972–85. doi:10.1074/jbc.M113.477547
- 362 10. Shindoh R, Kim C-L, Song C-H, Hasebe R, Horiuchi M. The region approximately between amino  
363 acids 81 and 137 of proteinase K-resistant PrP<sup>Sc</sup> is critical for the infectivity of the Chandler prion  
364 strain. *J Virol*. 2009;83: 3852–60. doi:10.1128/JVI.01740-08
- 365 11. Ayers JI, Schutt CR, Shikiya RA, Aguzzi A, Kincaid AE, Bartz JC. The strain-encoded relationship  
366 between PrP replication, stability and processing in neurons is predictive of the incubation period of  
367 disease. *PLoS Pathog*. 2011;7: e1001317. doi:10.1371/journal.ppat.1001317
- 368 12. Hill AF, Joiner S, Beck JA, Campbell TA, Dickinson A, Poulter M, et al. Distinct glycoform ratios of  
369 protease resistant prion protein associated with PRNP point mutations. *Brain*. 2006;129: 676–85.  
370 doi:10.1093/brain/awl013
- 371 13. Hafner-Bratkovic I, Bester R, Pristovsek P, Gaedtke L, Veranic P, Gaspersic J, et al. Globular  
372 domain of the prion protein needs to be unlocked by domain swapping to support prion protein

- 373 conversion. *J Biol Chem.* 2011;286: 12149–56. doi:10.1074/jbc.M110.213926
- 374 14. Damberger FF, Christen B, Pérez DR, Hornemann S, Wüthrich K. Cellular prion protein  
375 conformation and function. *Proc Natl Acad Sci U S A.* 2011;108: 17308–17313.
- 376 15. Christen B, Hornemann S, Damberger FF, Wüthrich K. Prion protein NMR structure from tamar  
377 wallaby (*Macropus eugenii*) shows that the beta2-alpha2 loop is modulated by long-range  
378 sequence effects. *J Mol Biol. Elsevier B.V.;* 2009;389: 833–45. doi:10.1016/j.jmb.2009.04.040
- 379 16. Lysek DA, Schorn C, Nivon LG, Esteve-Moya V, Christen B, Calzolari L, et al. Prion protein NMR  
380 structures of cats, dogs, pigs, and sheep. *Proc Natl Acad Sci U S A.* 2005;102: 640–5.  
381 doi:10.1073/pnas.0408937102
- 382 17. Wopfner F, Weidenhöfer G, Schneider R, von Brunn A, Gilch S, Schwarz TF, et al. Analysis of 27  
383 mammalian and 9 avian PrPs reveals high conservation of flexible regions of the prion protein. *J*  
384 *Mol Biol.* 1999;289: 1163–78. doi:10.1006/jmbi.1999.2831
- 385 18. Sigurdson CJ, Nilsson KPR, Hornemann S, Manco G, Fernández-borges N, Schwarz P, et al. A  
386 molecular switch controls interspecies prion disease transmission in mice. *J Clin Invest.* 2010;120:  
387 2590–9. doi:10.1172/JCI42051.with
- 388 19. Bett C, Fernández-Borges N, Kurt TD, Lucero M, Nilsson KPR, Castilla J, et al. Structure of the  
389  $\beta$ 2- $\alpha$ 2 loop and interspecies prion transmission. *FASEB J.* 2012;26: 2868–76.  
390 doi:10.1096/fj.11-200923
- 391 20. Tamgüney G, Giles K, Oehler A, Johnson NL, DeArmond SJ, Prusiner SB. Chimeric elk/mouse  
392 prion proteins in transgenic mice. *J Gen Virol.* 2013;94: 443–52. doi:10.1099/vir.0.045989-0
- 393 21. Angers RC, Kang H-E, Napier D, Browning S, Seward T, Mathiason C, et al. Prion strain mutation  
394 determined by prion protein conformational compatibility and primary structure. *Science.* 2010;328:  
395 1154–8. doi:10.1126/science.1187107
- 396 22. Taguchi Y, Mistica AMA, Kitamoto T, Schätzl HM. Critical significance of the region between Helix  
397 1 and 2 for efficient dominant-negative inhibition by conversion-incompetent prion protein. *PLoS*  
398 *Pathog.* 2013;9: e1003466. doi:10.1371/journal.ppat.1003466
- 399 23. Nishida N, Harris DA, Vilette D, Laude H, Frobert Y, Grassi J, et al. Successful Transmission of  
400 Three Mouse-Adapted Scrapie Strains to Murine Neuroblastoma Cell Lines Overexpressing  
401 Wild-Type Mouse Prion Protein. *J Virol.* 2000;74: 320–325.
- 402 24. Ishibashi D, Homma T, Nakagaki T, Fuse T. Strain-Dependent Effect of Macroautophagy on  
403 Abnormally Folded Prion Protein Degradation in Infected Neuronal Cells. *PLoS One.* 2015;10:  
404 e0137958. doi:10.1371/journal.pone.0137958
- 405 25. Zahn R, Güntert P, von Schroetter C, Wüthrich K. NMR Structure of a Variant Human Prion Protein  
406 with Two Disulfide Bridges. *J Mol Biol.* 2003;326: 225–234. doi:10.1016/S0022-2836(02)01332-3
- 407 26. Knowles TPJ, Zahn R. Enhanced stability of human prion proteins with two disulfide bridges.  
408 *Biophys J. Elsevier;* 2006;91: 1494–500. doi:10.1529/biophysj.106.081653

- 409 27. Winklhofer KF, Heske J, Heller U, Reintjes A, Muranyi W, Moarefi I, et al. Determinants of the in  
410 vivo folding of the prion protein. A bipartite function of helix 1 in folding and aggregation. *J Biol*  
411 *Chem.* 2003;278: 14961–70. doi:10.1074/jbc.M209942200
- 412 28. Shibuya S, Higuchi J, Shin RW, Tateishi J, Kitamoto T. Codon 219 Lys allele of PRNP is not found  
413 in sporadic Creutzfeldt-Jakob disease. *Ann Neurol.* 1998;43: 826–8. doi:10.1002/ana.410430618
- 414 29. Perrier V, Kaneko K, Safar J, Vergara J, Tremblay P, DeArmond SJ, et al. Dominant-negative  
415 inhibition of prion replication in transgenic mice. *Proc Natl Acad Sci U S A.* 2002;99: 13079–13084.
- 416 30. Kaneko K, Zulianello L, Scott M, Cooper CM, Wallace AC, James TL, et al. Evidence for protein X  
417 binding to a discontinuous epitope on the cellular prion protein during scrapie prion propagation.  
418 *Proc Natl Acad Sci U S A.* 1997;94: 10069–10074.
- 419 31. Biljan I, Giachin G, Ilc G, Zhukov I, Plavec J, Legname G. Structural basis for the protective effect  
420 of the human prion protein carrying the dominant-negative E219K polymorphism. *Biochem J.*  
421 2012;446: 243–51. doi:10.1042/BJ20111940
- 422 32. Giachin G, Biljan I, Ilc G, Plavec J, Legname G. Probing early misfolding events in prion protein  
423 mutants by NMR spectroscopy. *Molecules.* 2013;18: 9451–76. doi:10.3390/molecules18089451
- 424 33. Taguchi Y, Schätzl HM. Identifying critical sites of PrP<sup>C</sup>-PrP<sup>Sc</sup> interaction in prion-infected cells by  
425 dominant-negative inhibition. *Prion.* 2013;7: 1–5.
- 426 34. Fass D. Disulfide bonding in protein biophysics. *Annu Rev Biophys.* 2012;41: 63–79.  
427 doi:10.1146/annurev-biophys-050511-102321
- 428 35. Kurt TD, Jiang L, Bett C, Eisenberg D, Sigurdson CJ. A proposed mechanism for the promotion of  
429 prion conversion involving a strictly conserved tyrosine residue in the  $\beta$ 2- $\alpha$ 2 loop of PrP<sup>C</sup>. *J Biol*  
430 *Chem.* 2014;289: 10660–7. doi:10.1074/jbc.M114.549030
- 431 36. Shirai T, Saito M, Kobayashi A, Asano M, Hizume M, Ikeda S, et al. Evaluating Prion Models Based  
432 on Comprehensive Mutation Data of Mouse PrP. *Structure.* Elsevier Ltd; 2014; 1–12.  
433 doi:10.1016/j.str.2013.12.019
- 434 37. Striebel JF, Race B, Meade-white KD, Lacasse R, Chesebro B. Strain Specific Resistance to  
435 Murine Scrapie Associated with a Naturally Occurring Human Prion Protein Polymorphism at  
436 Residue 171. *PLoS Pathog.* 2011;7: e1002275. doi:10.1371/journal.ppat.1002275
- 437 38. Saijo E, Hughson AG, Raymond GJ, Suzuki A, Horiuchi M, Caughey B. PrP<sup>Sc</sup>-Specific Antibody  
438 Reveals C-terminal Conformational Differences between Prion Strains. *J Virol.* 2016; JVI.00088-16.  
439 doi:10.1128/JVI.00088-16
- 440 39. Hennes J, Jullian B, Steven AC, Kajava A V. Standard Conformations of  $\beta$ -Arches in  $\beta$ -Solenoid  
441 Proteins. *J Mol Biol.* 2006;358: 1094–1105. doi:10.1016/j.jmb.2006.02.039
- 442 40. Seno H, Tashiro H, Ishino H, Inagaki T, Nagasaki M, Morikawa S. New haplotype of familial  
443 Creutzfeldt-Jakob disease with a codon 200 mutation and a codon 219 polymorphism of the prion  
444 protein gene in a Japanese family. *Acta Neuropathol.* 2000;99: 125–30. Available:

- 445 <http://www.ncbi.nlm.nih.gov/pubmed/10672318>
- 446 41. Lukic A, Beck J, Joiner S, Fearnley J, Sturman S, Brandner S, et al. Heterozygosity at polymorphic  
447 codon 219 in variant creutzfeldt-jakob disease. *Arch Neurol*. 2010;67: 1021–3.  
448 doi:10.1001/archneurol.2010.184
- 449 42. Hizume M, Kobayashi A, Teruya K, Ohashi H, Ironside JW, Mohri S, et al. Human prion protein  
450 (PrP) 219K is converted to PrPSc but shows heterozygous inhibition in variant Creutzfeldt-Jakob  
451 disease infection. *J Biol Chem*. 2009;284: 3603–9. doi:10.1074/jbc.M809254200
- 452 43. Agrimi U, Nonno R, Dell'Omo G, Di Bari MA, Conte M, Chiappini B, et al. Prion protein amino acid  
453 determinants of differential susceptibility and molecular feature of prion strains in mice and voles.  
454 *PLoS Pathog*. 2008;4: e1000113. doi:10.1371/journal.ppat.1000113
- 455 44. Taguchi Y, Nishida N. Secondary-structure prediction revisited□: Theoretical  $\beta$  -sheet propensity  
456 and coil propensity represent structures of amyloids and aid in elucidating phenomena involved in  
457 interspecies transmission of prions. *PLoS One*. 2017;12: e0171974.  
458 doi:10.1371/journal.pone.0171974
- 459 45. Riek R, Hornemann S, Wider G, Glockshuber R, Wüthrich K. NMR characterization of the  
460 full-length recombinant murine prion protein, mPrP(23–231). *FEBS Lett*. 1997;413: 282–288.  
461 doi:10.1016/S0014-5793(97)00920-4  
462  
463

464 **FIGURE LEGENDS**

465 **FIGURE 1.** Design and expression of mutant PrPs with two cysteine (Cys) substitutions, 165C;C- and  
466 166C;C-series.

467 **A.** A schematic illustration of the secondary-structure components of mouse PrP and positions of the  
468 substituted Cys. MoPrP, sequences of wild-type mouse PrP. B1 and B2, the first and the second  $\beta$  strands,  
469 respectively. H1, H2 and H3, the first, second and third  $\alpha$  helices[45]. 165C or 166C was combined with  
470 another Cys scanning the distal H3 (Ctrm) from 220 to 229 (165C;C- or 166C;C-series, respectively;  
471 substituted Cys are underlined). The solid and broken lines with “-S-S-“ represent the native and the  
472 newly-introduced disulfide crosslink, respectively.

473 **B and C.** Expression levels and banding patterns of 165C;C- or 166C;C-series. Immunoblots with 3F4  
474 monoclonal antibody (mAb) of whole-cell lysates of transiently-transfected N2a cells. Each two-Cys  
475 construct is named after the last digits of the residue numbers of the substituted Cys (in mouse numbering).  
476 165C or 166C, mutants with Cys only at 165 or 166, respectively. Square brackets, positions of dimeric  
477 forms of the mutant PrPs. The upper panels and lower panels of blots represent images of short- and  
478 long-exposure to the same PVDF membranes, respectively. Note that all the constructs have the similar  
479 banding patterns as (3F4)MoPrP, indicating the complex-type N-linked glycosylation. Two-Cys mutants  
480 show trace amounts of dimers whereas 165C or 166C have discernible dimers despite their low  
481 expression levels. Bottom panels are graphs showing expression levels of each series quantified by  
482 densitometry. Each bar represents mean  $\pm$  standard deviation from three independent experiments.

483 **D.** Single-Cys PrPs have substantial levels of dimers which disappear by dithiothreitol (DTT) treatment.  
484 Immunoblots with 3F4 mAb showing banding patterns of mutant PrPs with only a single Cys substitution  
485 either in H1~H2 or Ctrm. DTT (+) and (-), samples with or without DTT in the sample buffer. The square  
486 bracket indicates the position of the dimeric forms.

487 **E.** Disruption of the native disulfide bond drastically changes the banding pattern, suggesting the  
488 substituted Cys of 165C;C- or 166C;C-series do not affect the native disulfide bond. **Left panel.** A  
489 schematic illustrating positions of alanine substitutions for the native Cys. The solid or broken lines with  
490 “-S-S-“ in the schematic illustration represents putative disulfide crosslinks of 6C;C213A or 6C;C178A,  
491 respectively. **Right panel.** Immunoblots with 3F4 mAb showing banding patterns of the mutant PrPs  
492 combining 166C with the alanine substitution. Note that the banding patterns of 6C;C178A and 6C;C213A  
493 are very different from that of 166C, presumably high-mannose-type N-glycosylation, unlike the banding  
494 patterns of 165C;C- or 166C;C-series constructs.

495 **FIGURE 2.** 166C;C-series mutants show the same subcellular localization as the wild-type mouse PrP.  
496 Epifluorescence microscopic images of immunofluorescence with 3F4 mAb with or without  
497 permeabilization. All of the C;C-constructs exhibit the same localization patterns as the wild-type, i.e. on  
498 the cell-surface and in the perinuclear regions. Scale bars, 25  $\mu$ m.

499 **FIGURE 3.** Substituted Cys of 166C;C-constructs form an intramolecular disulfide crosslink: assessment  
500 of fragment patterns after V8 protease digestion.

501 **A.** A schematic illustrating the position of the FLAG tag of the FLAG-tagged 166C;C-constructs along with  
502 putative cleavage sites by V8 protease (vertical lines).

503 **B.** V8-digested fragment profiles are similar between the FLAG-tagged wild-type [(3F4)Mo-FL] and  
504 166C-FLAG (166C-FL) but those of 6C;3C-FLAG and 6C;9C-FLAG (6C;3C-FL and 6C;9C-FL,  
505 respectively) are different. Immunoblots with anti-FLAG polyclonal antibody, or 3F4-mAb, showing  
506 non-digested and V8-digested PrPs with or without DTT in the sample buffer. The upper-panel and  
507 middle-panel images were obtained from the same PVDF membrane with shorter and longer exposure,  
508 respectively. The bottom panel is immunoblots reprobbed with 3F4-mAb. Arrowhead, full-length  
509 FLAG-tagged PrP molecules. Curled brackets, positions of the intermediate-size fragments that diminish  
510 by DTT. Square brackets, smallest fragments.

511 **FIGURE 4.** 165C;C- and 166C;C-series mutants convert to PK-resistant forms (PK-res) on 22L-ScN2a.  
512 The upper and lower panels represent images of short- and long-exposure to the same PVDF membranes,  
513 respectively. The square brackets indicates the position of the dimeric form.

514 **A and B.** PK-res of 165C;C- and 166C;C-series, respectively. Immunoblots with 3F4-mAb demonstrating  
515 levels of PK-res. Note that PK-res of C;C-series lack the dimeric forms, just as PrP<sup>C</sup> isoforms.

516 **C.** PK-res of 166C;C-series maintain the intramolecular disulfide crosslinks throughout conversion.  
517 Immunoblots with 3F4-mAb showing PK-res of 166C;C-series and mutant PrPs with a single substituted  
518 Cys, either at 166C or in Ctrm. Note that all the single-Cys constructs have substantial levels of dimeric  
519 forms, in contrast to 166C;C-series.

520 **D.** The dimeric forms of PK-res of single-Cys mutants disappear by DTT, proving intermolecular disulfide  
521 crosslinks. Immunoblots with 3F4-mAb comparing single-Cys PrP, 166C and 229C, and a double-Cys PrP,  
522 6C;9C. DTT (+) and (-), samples prepared with or without DTT in the sample buffer.

523 **E.** PK-res formation of 6C;9C is PrP<sup>Sc</sup>-dependent. Immunoblots with 3F4-mAb demonstrating PK-res in the  
524 lysates from 22L-scrapie-infected and non-infected N2a cells, transiently-transfected with (3F4)MoPrP or  
525 C;9C. 22L + or -, samples from 22L-infected or non-infected N2a. PK + or -, samples with or without PK  
526 digestion. Note that there is no PK-res in lysates from non-infected N2a.

527 **F.** Conversion-incompetent C;C-PrPs can interact with PrP<sup>Sc</sup>. Immunoblots with 3F4-mAb showing rather  
528 efficient dominant-negative inhibition effects on co-transfected (3F4)MoPrP by the conversion-incompetent  
529 C;C-PrPs, namely 6C;0-6C;5C.  $\Delta$ 159, a deletion mutant PrP lacking the residue 159 as a control[22], was  
530 on the same membrane and unnecessary lanes were eliminated.

531 **G.** PK-res-conversion reaction of 6C;9C is relatively resistant to inhibitory effects of Q218K substitution.  
532 Immunoblots with 3F4-mAb comparing PK-res of wild-type or 6C;9C and their Q218K counterparts.  
533 Decrements of PK-res formation by Q218K is smaller in 6C;9C than that in wild-type.

534 **FIGURE 5.** A model to explain the discrepancy between the high-expression mutants and  
535 PK-res-convertible mutants.

536 **A.** Hypothetical positional changes of H1~H2 in the PrP<sup>Sc</sup>-dependent conversion reaction.



537 **B.** A crosslink between the residues 165 (or 166) and the distal portion of Ctrm deforms the conformation  
538 of PrP<sup>C</sup> but does not severely affect the conversion because the position of H1~H2 is suitable for  
539 conversion.

540 **C.** A crosslink between the residues 165 (or 166) and the proximal portion of Ctrm, e.g. 220C, might inhibit  
541 PK-res conversion by hampering the positional changes of H1~H2.

542 **D.** Could there be a disulfide crosslink connecting the more C-terminal H1~H2 and the more proximal Ctrm  
543 which would not hamper the conversion to PK-res?

544 **FIGURE 6.** Convertible mutants of 168C;C-series supports the hypothetical positional change of H1~H2  
545 during conversion to PK-res. The upper panels and lower panels of blots represent images of short- and  
546 long-exposure to the same PVDF membranes, respectively.

547 **A.** A schematic illustrating positions of substituted Cys residues of 167C;C-, 168C;C- and 169C;C-series.

548 **B.** PrP<sup>C</sup> forms of 168C;C-series showed similar banding patterns as the wild-type PrP. Immunoblots with  
549 3F4-mAb showing expression levels and banding patterns of 168C;C-series. Square brackets, positions of  
550 dimeric forms of the mutant PrPs.

551 **C.** Conversion capabilities of 168C;C- series. Immunoblots with 3F4-mAb demonstrating levels of PK-res  
552 of 168C;C-series. The square brackets indicates the position of the dimeric form. Like PrP<sup>C</sup> forms, PK-res  
553 of 168C;C-series also lack the dimeric forms.

554 **D.** PK-res formation of 8C;5C is PrP<sup>Sc</sup>-dependent like 6C;9C,. Immunoblots with 3F4-mAb comparing  
555 samples prepared from 22L-ScN2a and non-infected N2a transfected with 8C;5C or 6C;9C, digested at  
556 different concentrations of PK. Left and right panels, samples from cells transfected with 8C;5C and 6C;9C,  
557 respectively. Note that PK-res of 8C;5C is present only in 22L-ScN2a like 6C;9C.

558 PK-digested and non-digested samples were on the same membrane and unnecessary lanes were  
559 removed.

560 **E.** Conversion of 8C;5C into PK-res isoform is strain dependent. Immunoblots with 3F4-mAb comparing  
561 PK-res of (3F4)MoPrP and 8C;5C from transiently transfected Fukuoka1-infected or RML-infected N2a58  
562 cells. Note that 8C;5C does not convert to PK-res in the Fukuoka1-infected cells, while it can convert in the  
563 RML-infected cells.

# Figure 1

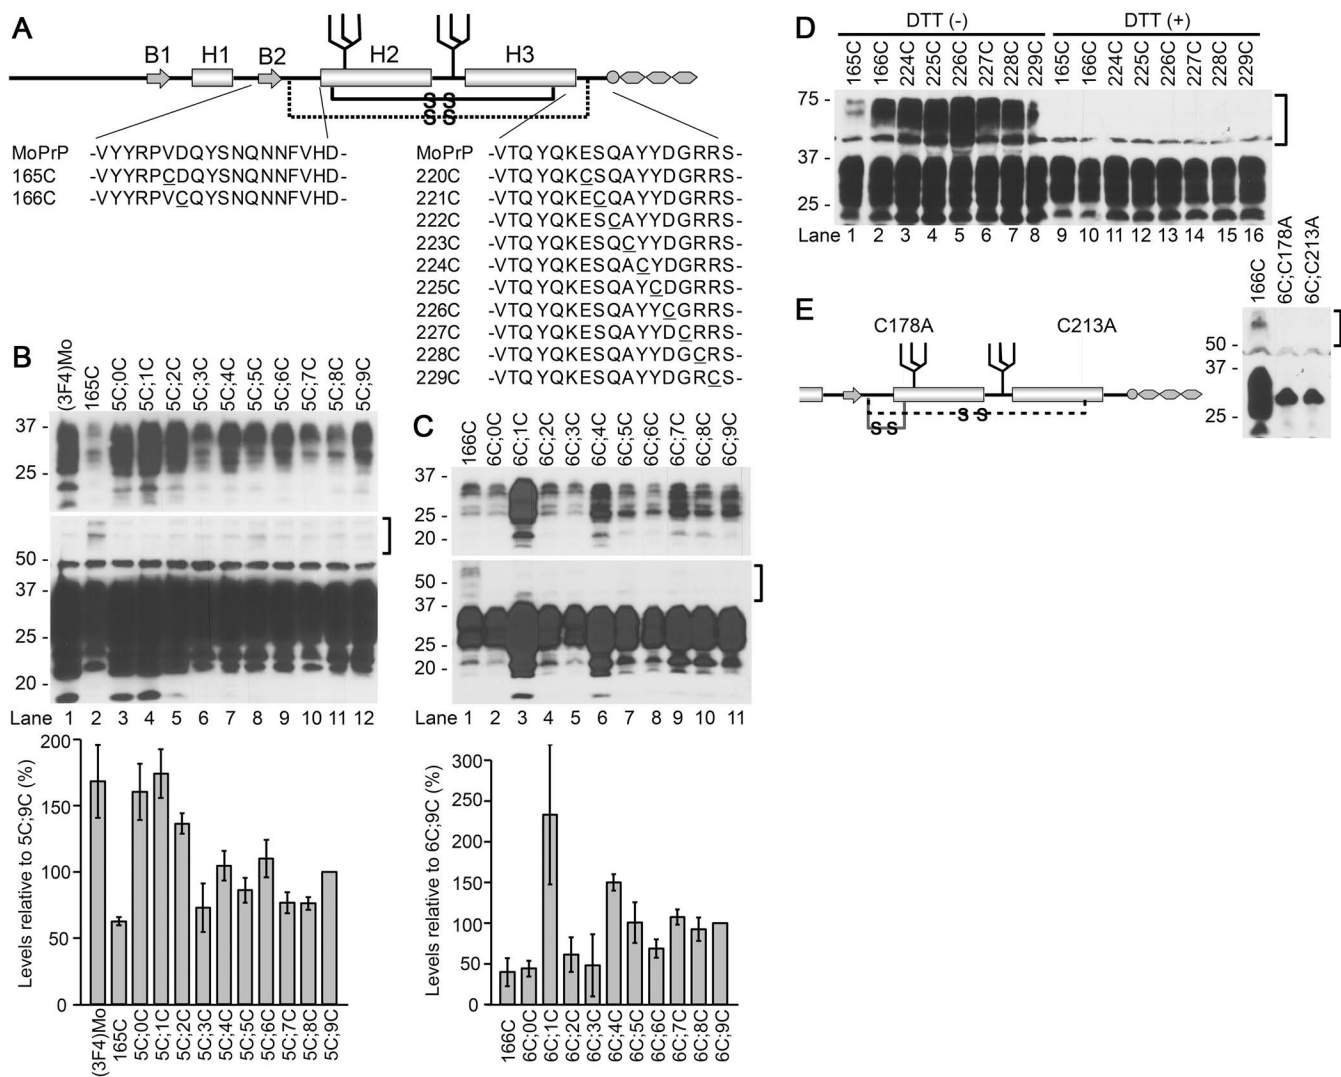

# Figure 2

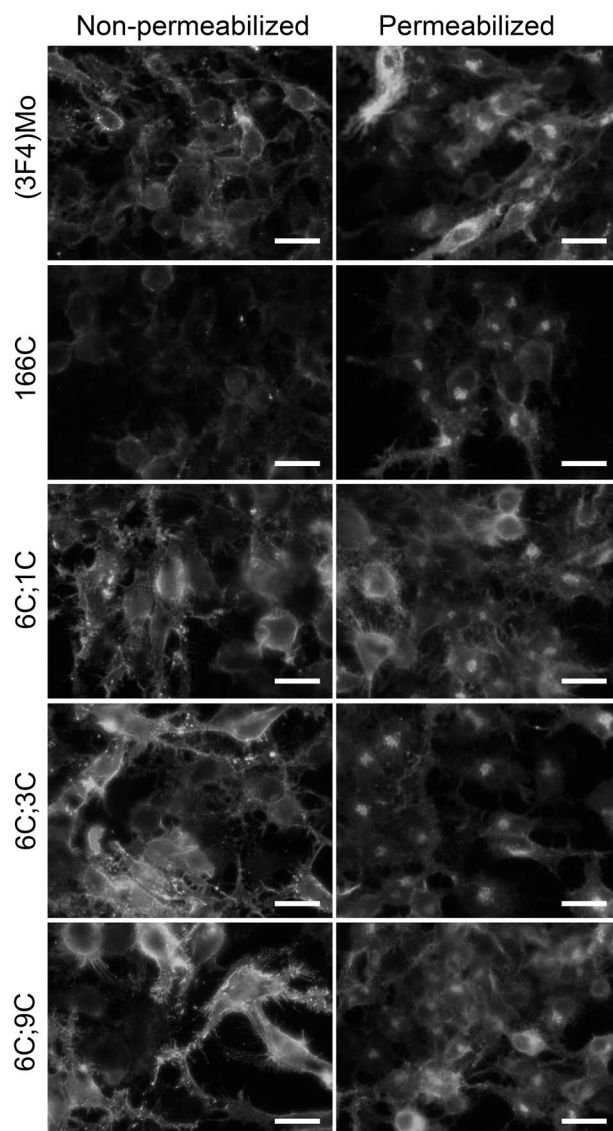

# Figure 3

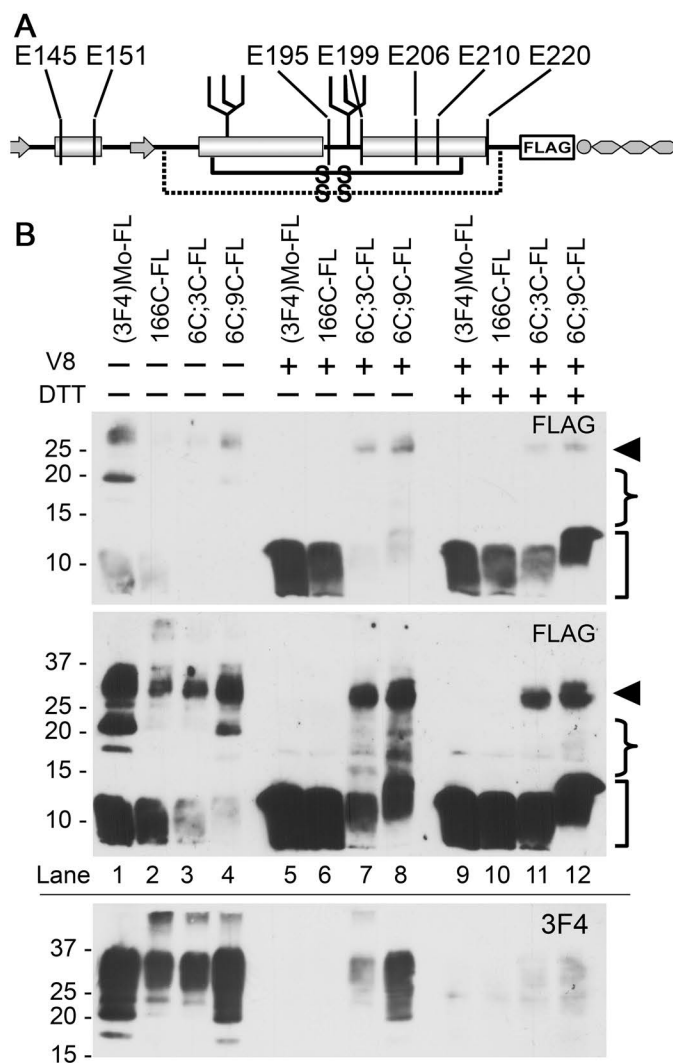

# Figure 4

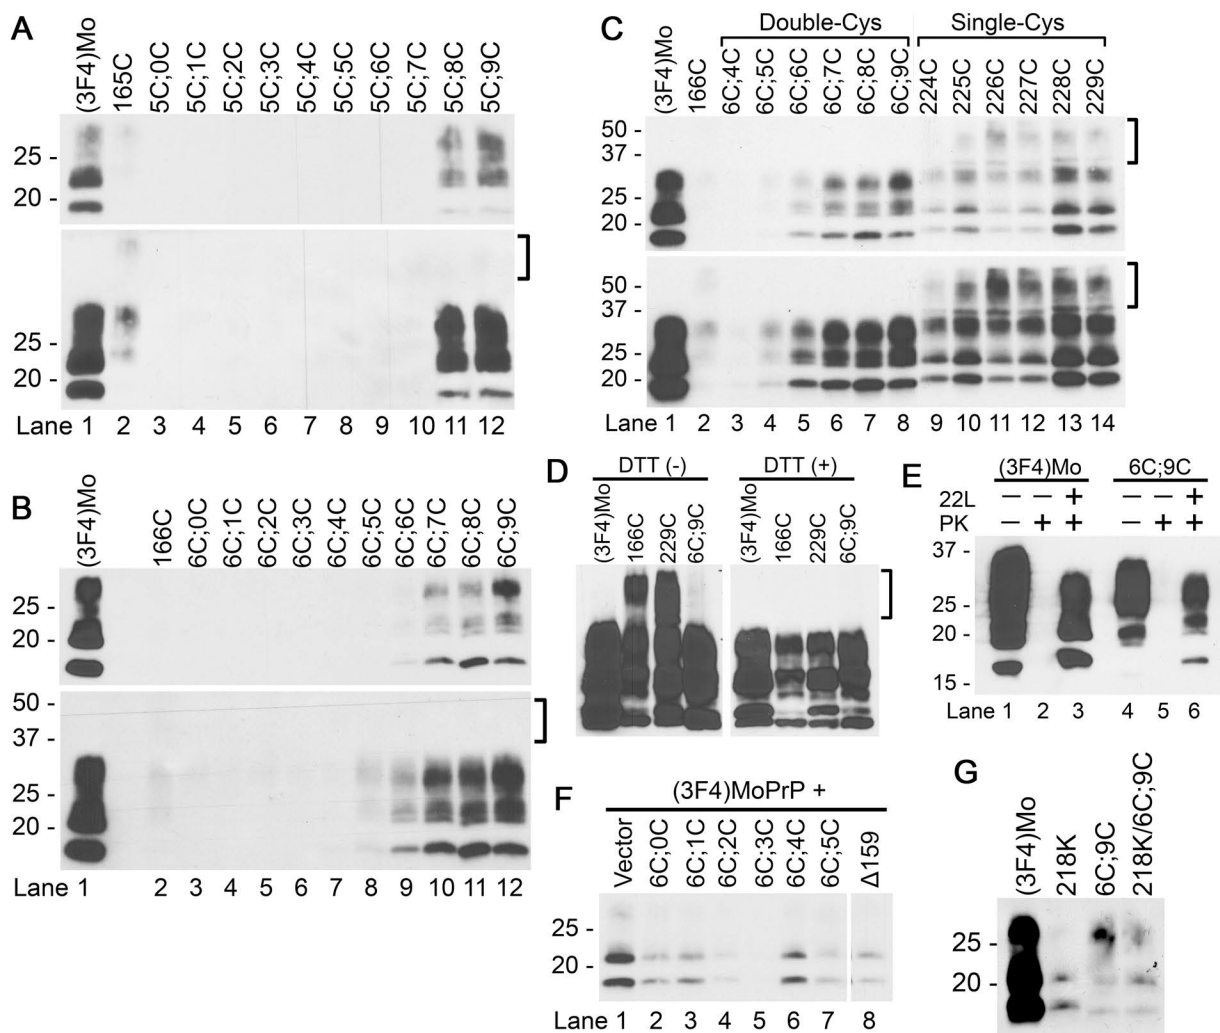

# Figure 5

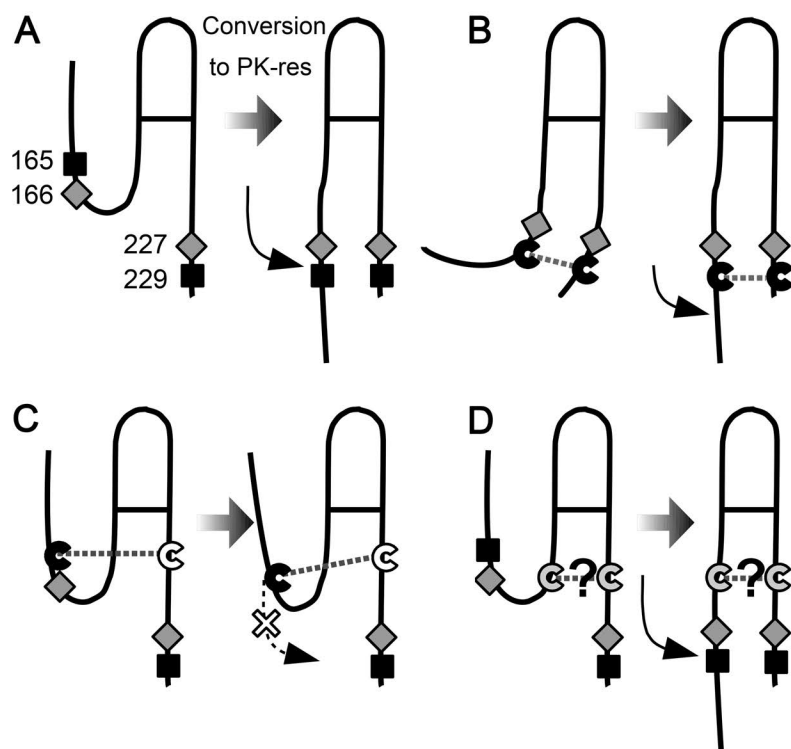

# Figure 6

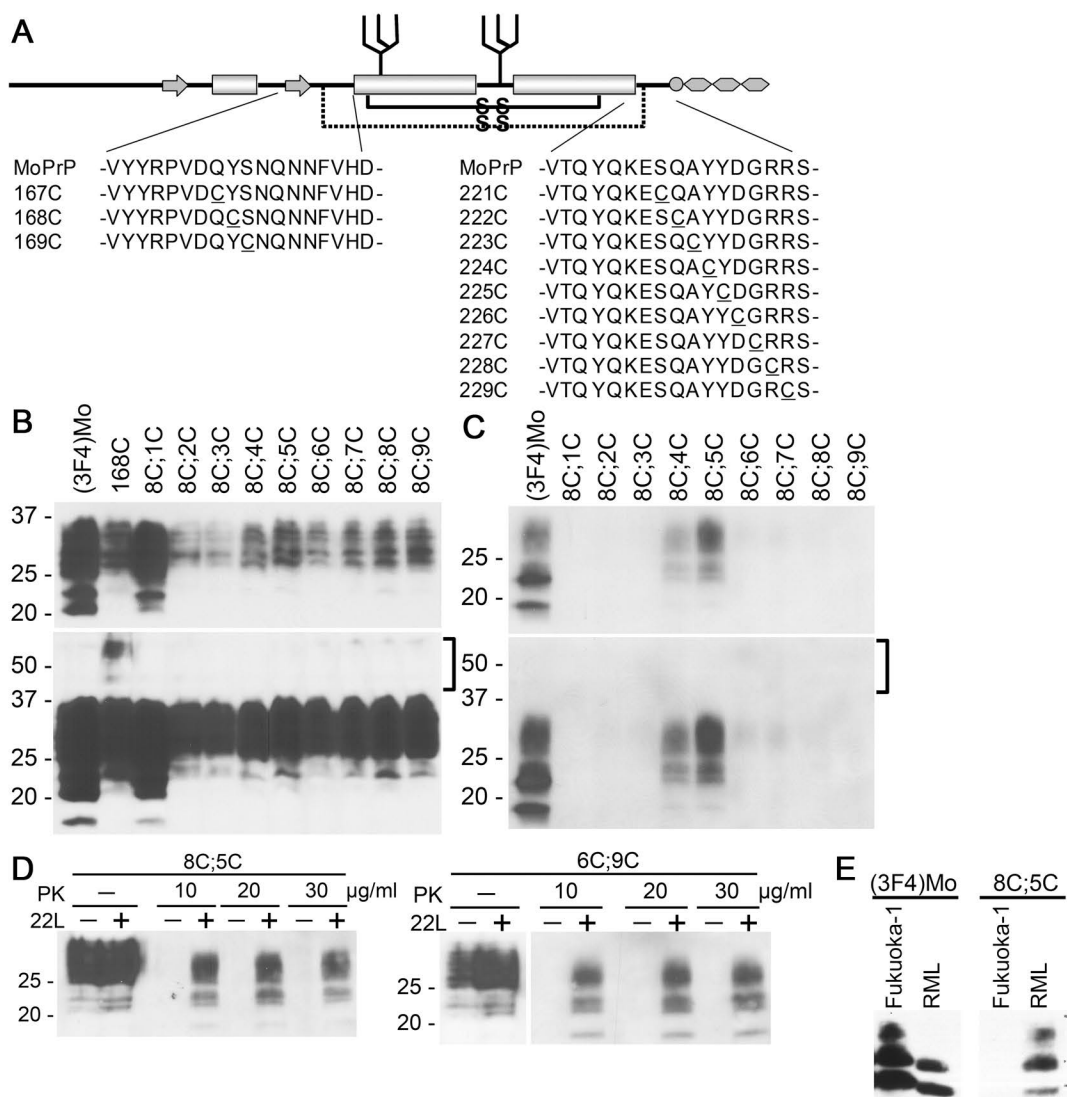

Source: http://biorxiv.org/content/10.1101/175919v1.full.pdf
